# Supplementary material for: Effects of Light-Emitting Diode Irradiation on Growth Characteristics and Regulation of Porphyrin Biosynthesis in Rice Seedlings
Source: PubMed Central journal article supplement (PMC5372653; doi:10.3390/ijms18030641), 2017-03-16
Supplement: ijms-18-00641-s001.pdf [file ijms-18-00641-s001.pdf]

**Table S1.** Emission spectra of LEDs used in this study.

| LED   | Wavelength range (nm) |
|-------|-----------------------|
| White | 420–680 nm            |
| Blue  | 460–490 nm            |
| Green | 520–550 nm            |
| Red   | 620–650 nm            |

**Table S2.** Primers used for qRT-PCR assays.

| Gene         | Primer sequence                                     |
|--------------|-----------------------------------------------------|
| <i>HEMA1</i> | F: GCTATGGGTGGTGTTCGACT<br>R: CGATCTTCTGGAGGCACTTC  |
| <i>GSA</i>   | F: CTCCGTGACTTGACGAAACA<br>R: GTAGGTTCCAGGCTCCATCA  |
| <i>ALAD</i>  | F: GTCCACCGTCTCCTTCTCC<br>R: TGTCAAGTCAAGAGGCCTGA   |
| <i>PPO1</i>  | F: ACAGTTCCTCATTGGCCATC<br>R: CCCATGAAATTTTGTGCTGCT |
| <i>CHLD</i>  | F: TGGGACAGCAAAGACAGTGA<br>R: AAGGCCAGGTTGAAACACAG  |
| <i>CHLH</i>  | F: GTGTGGGTTGCGTTCTTTTT<br>R: GGTGACAATGTGGCTCCTCT  |
| <i>CHLI</i>  | F: TGTGCTTCTGGATTCTGCTG<br>R: GCTGGAGCTTGTCTTGTTCC  |
| <i>PORB</i>  | F: GTGAATTGCCAGGTTTTTCGT<br>R: GCAATTAGCAAAGCTGCACA |
| <i>FC2</i>   | F: TTGGTGCTATGGCAGTTTCA<br>R: AGTGGAAACAAAGGCAGGATG |
| <i>HO1</i>   | F: AGCGCTAGCAGTAGCAGGAG<br>R: GCTCCTTCTCCCCTTCCTT   |
| <i>HO2</i>   | F: AGGGACCTAGCAGCCCTAAC<br>R: CCCGTATCGTCCATCTTGAG  |
| <i>Lhcb1</i> | F: CAGCTCTCACAGCTCACTGC<br>R: GTGTCCCACCCGTAGTCG    |
| <i>Lhcb6</i> | F: CTCATGGGCTGGGTAGAGTC<br>R: CGGCCTCGAAGTAGAAGATG  |

*RbcS*

F: GCAGCTTTGTTTTGGGCTAT

R: CCGGAGCTTTGTTTTACAT

*Actin*

F: CTTTCATAGGAATGGAAGCTGCGGGTA

R: CGACCACCTTGATCTTCATGCTGCTA

---

F, forward; R, reverse.
